## Review

# Molecular and cellular interface between behavior and acute coronary syndromes

Yori Gidron<sup>a,\*</sup>, Harel Gilutz<sup>b</sup>, Rivka Berger<sup>c</sup>, Mahmoud Huleihel<sup>d</sup><sup>a</sup>*Department of Sociology of Health, Faculty of Health Sciences, Ben-Gurion University, Be'er Sheeba 84105, Israel*<sup>b</sup>*Department of Cardiology, Faculty of Health Sciences, Ben-Gurion University, Be'er Sheeba 84105, Israel*<sup>c</sup>*Department of Internal Medicine, Faculty of Health Sciences, Ben-Gurion University, Be'er Sheeba 84105, Israel*<sup>d</sup>*Department of Microbiology and Immunology, Faculty of Health Sciences, Ben-Gurion University, Be'er Sheeba 84105, Israel*

Received 28 August 2001; accepted 8 May 2002

---

**Abstract**

This review article integrates empirical findings from various scientific disciplines into a proposed psychoneuroimmunological (PNI) model of the acute coronary syndrome (ACS). Our starting point is an existing, mild, atherosclerotic plaque and a dysfunctional endothelium. The ACS is triggered by three stages. (1) Plaque instability: Pro-inflammatory cytokines (IL-1, IL-6, TNF- $\alpha$ ) and chemoattractants (MCP-1, IL-8) induce leukocyte chemoattraction to the endothelium, and together with other triggers such as the CD40L–CD40 co-stimulation system activate plaque monocytes (macrophages). The macrophages then produce matrix metalloproteinases that disintegrate extra-cellular plaque matrix, causing coronary plaque instability. Acute stress, hostility, depression and vital exhaustion (VE) have been associated with elevated pro-inflammatory cytokines and leukocyte levels and their recruitment. (2) Extra-plaque factors promoting rupture: Neuro-endocrinological factors (norepinephrine) and cytokines induce vasoconstriction and elevated blood pressure (BP), both provoking a vulnerable plaque to rupture. Hostility/anger and acute stress can lead to vasoconstriction and elevated BP via catecholamines. (3) Superimposed thrombosis at a ruptured site: Increases in coagulation factors and reductions in anticoagulation factors (e.g. protein C) induced by inflammatory factors enhance platelet aggregation, a key stage in thrombosis. Hostility, depression and VE have been positively correlated with platelet aggregation. Thrombosis can lead to severe coronary occlusion, clinically manifested as an ACS. Thus, PNI processes might, at least in part, contribute to the pathogenesis of the ACS. This chain of events may endure due to lack of neuroendocrine-to-immune negative feedback stemming from cortisol resistance. This model has implications for the use of psychological interventions in ACS patients.

© 2002 Elsevier Science B.V. All rights reserved.

**Keywords:** Coronary disease; Cytokines; Immunology; Thrombosis/embolism

---

**1. Introduction**

The acute coronary syndrome (ACS) includes unstable angina and Q-wave and non Q-wave acute myocardial infarction (MI). Most ACS patients develop occlusions in coronary arteries not severely occluded in prior angiograms [1]. This suggests that rapid and more transient processes lead to an arterial occlusion and to an ACS, rather than long-term atherosclerotic processes related to typical risk factors (e.g. cholesterol). Indeed, during the past decade, the understanding of the etiology of the ACS

has shifted from emphasis on the role of the major risk factors alone (e.g. lipids, smoking, hypertension) to the inclusion of immune factors and the inflammatory response [2,3]. This thought shift and introduction of multiple systems in the etiology of ACS allows researchers to seek a broader explanation of previous links between psychological factors and the ACS. The field of psychoneuroimmunology (PNI), as described below, provides such a broad framework. Endothelium dysfunction and injury are the basis of the onset of the atherosclerotic process [3] and psychological stress has been associated with the dysfunction of the coronary endothelium [4,5]. However, the

\*Corresponding author. Fax: +11-9728-6477-635.

E-mail address: yorig.bgumail.bgu.ac.il (Y. Gidron).

---

Time for primary review 18 days.

starting point of the present article is an existing moderate atherosclerotic plaque with a dysfunctional endothelium, continuing with how PNI processes may lead to further deterioration and to the ACS. This review will first present studies linking psychological factors with the ACS, and present the current three-stage immunobiological model of the ACS. After introducing the field of PNI, we then present the PNI of the ACS. Finally, additional points and suggestions for future research and clinical implications will be suggested.

## 2. Psychological factors associated with the ACS

Many studies have demonstrated a relation between psychological factors and onset and prognosis of the ACS. Hostility is defined as the tendency to behave antagonistically, think cynically and feel anger [6] and has been found to be the most toxic element of the previously assumed 'coronary prone' type-A behavior pattern [7]. Hostility has been associated with unstable angina [8] and with onset of MI [9,10], and significantly predicts coronary heart disease (CHD), independent of known risk factors [7,11,12]. Vital exhaustion is defined as a state of unusual tiredness, irritability and demoralization, and significantly predicts cardiac events [13]. Finally, depression and helplessness significantly predict ACS onset and post-MI mortality [14–16]. The few articles that related PNI factors to the ACS provide important information for understanding the PNI of CHD [17–21]. However, these previous reviews did not integrate PNI processes with the three fundamental biological stages of the ACS described below. That is the purpose of the present article.

## 3. The three-stage immunobiology of the ACS

### 3.1. Immunobiology of plaque instability

An unstable and subsequently ruptured atherosclerotic coronary plaque with superimposed thrombosis constitutes the most common general pathological background of the ACS [2]. In most cases, plaque rupture is the major cause of ACS, yet in 18–37% of ACS cases, thrombosis takes place on an eroded but not ruptured plaque [22].

The precise chronological order of the events leading to plaque instability is not entirely known. Several factors including oxidized low-density lipoprotein (OX-LDL) cholesterol [23,24], *Chlamydia pneumoniae* (CP) [25] cytomegalovirus (CMV) [26] and the co-stimulatory pair CD40L–CD40 (see below) may act as triggers leading to plaque instability. Adherence of activated polymorphonuclear cells, monocytes and lymphocytes to a dysfunctional coronary endothelium takes place in response to the activity of chemoattractants such as monocyte chemoattractant protein 1 (MCP1), interleukin-8 (IL-8), and the

secretion of the pro-inflammatory cytokines IL-1, IL-6, tumor necrosis factor- $\alpha$  (TNF- $\alpha$ ) and OX-LDL [2,23]. On the side of the coronary vessel, cytokines initiate the expression of endothelial adhesion molecules such as vascular cellular adhesion molecule (VCAM) and intercellular adhesion molecule (ICAM) [27], which increase binding of the leukocytes described above to the endothelium. High levels of IL-6 and IL-8 have been found in unstable angina [28,29], possibly supporting their role in ACS. Cytokines induce their own autocrine expression and the expression of such adhesion molecules via the cellular transcription factor NF- $\kappa$ B [27]. Support for the role of NF- $\kappa$ B in the instability of coronary plaques can be derived from a study finding its activation in 82% of unstable-angina patients compared to only 12% of stable-angina patients [30]. However, given the retrospective design of the latter study, it is unclear whether differences in NF- $\kappa$ B activity represent the antecedent or consequence of coronary instability. Monocytes adhering to the endothelium and penetrating into the plaque (macrophages) are activated by several paracrine/autocrine mediators such as macrophage colony-stimulating factor (MCSF) and by pro-inflammatory cytokines. Another important extra-plaque factor activating macrophages in the plaque is the co-stimulatory pair CD40 ligand (CD40L)–CD40. The CD40L on T-cells binds to the CD40-receptor on macrophages and this activates macrophages [31]. The CD40L–CD40 system may reflect a link between the general circulation and the coronary plaque. At this crucial stage, activated macrophages then synthesize and secrete matrix metalloproteinases (MMPs) [31]. Metalloproteinases degrade vascular extra-cellular collagen matrix, thereby weakening the cap of the coronary plaque [2,32]. Supporting their role in the ACS, these degrading factors were found to be active in a higher proportion of unstable angina cases compared to stable angina cases [33]. Furthermore, interferon (INF)- $\gamma$  (of activated T-cell origin) may directly induce degradation (possibly necrosis) of smooth muscle-cells (SMC), another path by which the coronary plaque becomes weak and unstable [34]. Plaque cap weakening contributes to coronary plaque instability and vulnerability towards rupture.

### 3.2. Immunobiology of plaque rupture

Several factors external to the coronary plaque are thought to increase the chance of plaque rupture, particularly given a weak plaque cap occurring in the former stage. Two of these factors, vasoconstriction and elevated blood-pressure (BP) [2] are detailed in the present article given their demonstrated relation to psychological factors detailed below. Both TNF- $\alpha$  and IL-6 have been found to experimentally induce arterial vasoconstriction [35]. One possible pathway by which cytokines cause spasms may be by the regulation of nitric oxide (NO) production [36].

Finally, platelets circulating near the plaque, release thromboxane  $A_2$ , which causes vasoconstriction as well.

Immunological factors are also associated with elevated BP. Hypertensive patients were found to have higher levels of IL-1 $\beta$  than various controls, and IL-1 $\beta$  is positively correlated with BP ( $r=0.38$ ) in hypertensive patients [37]. Furthermore, injection of IL-1 $\beta$  was found to increase sympathetic discharge and BP in anesthetized rats [38] suggesting a causal role of IL-1 $\beta$  in elevated BP. If sufficiently strong or enduring, vasoconstriction and elevated BP will lead to plaque rupture [2].

### 3.3. Immunobiology of thrombosis

Under normal conditions, the endothelium maintains balance between cell surface-associated coagulants such as tissue factor (TF), one of several molecules inducing the coagulation pathway and anticoagulant proteins (thrombomodulin, protein S). The anticoagulant pathway including protein C and protein S and cytokines (such as IL-8) have been proposed as the common link between coagulation and the inflammatory response [39,40]. Studies have shown that IL-1, IL-6 and TNF- $\alpha$  have been found to have a role in activation of platelets [41]. These cytokines induce the expression of adhesion molecules (e.g. VCAM) on endothelial cells as mentioned above, and also attract platelets to the ruptured site. TNF- $\alpha$  is capable of inducing expression of TF on monocytes and on endothelial cells and down regulating thrombomodulin and protein S [42]. TF then begins the coagulation cascade [43]. Furthermore, following stimulation by IL-1 or TNF $\alpha$ , endothelial cells can switch from anticoagulant to procoagulant participants [44], and the balance between pro and anticoagulation factors may be then impaired, leading to hypercoagulation. The CD40L–CD40 system could also affect thrombosis as it induces macrophages to secrete TF [31]. Hypercoagulability at a site of plaque rupture may then cause severe coronary occlusion in a previously moderately occluded plaque. Severe coronary occlusion may in turn result in any form of ACS—unstable angina or MI potentially leading to death as well.

## 4. The field of psychoneuroimmunology

The field of psychoneuroimmunology (PNI) investigates the relations between psychological factors and immune and neuroendocrine pathways, and the implications of such relations to illness and health. Psychological factors have been repeatedly related to enumerative and functional indices of the immune system (for meta-analysis, see Refs. [45,46]), to the common cold and wound healing rate [47–49], and to people's immune response to vaccinations [50]. Psychological interventions were found to affect various immune parameters such as lymphocyte proliferation [51] and cytokine patterns in asthmatic children [52].

Psychological factors have also been associated with factors construed as 'antigens' in the etiology of ACS such as oxidated LDL [53] and activation of viral and microbial agents [54].

How does the brain communicate with the immune system? The brain affects immune responses via the hypothalamic–pituitary–adrenal (HPA) axis. The HPA axis enhances the inflammatory response by secreting corticotrophic releasing hormone and adrenocorticotrophic hormone from the hypothalamus and pituitary gland, respectively, while the adrenal gland secretes cortisol that suppresses the inflammatory response. Cells of the immune system express receptors for these hormones. The immune to brain pathway is less evident. The brain receives signals about a local visceral immune response, and thereafter orchestrates a systemic inflammatory response in the following manner. Peripheral IL-1 at local inflamed visceral sites triggers vagal afferents to the central nervous system (CNS). More specifically, the vagal nerve sends neural signals to the hypothalamus via the nucleus tractus solitarius [55–57]. The hypothalamus and the HPA axis have been shown to be activated as a function of time and dose of peripheral IL-1 stimulation [58,59], and to orchestrate the inflammatory response. Two other brain regions, namely the amygdala and medulla, modulate the effects of IL-1 on the HPA axis [59,60]. This may be crucial to PNI since the amygdala has a prominent role in various psychological states such as helplessness [61] and depression [62], and the medulla is cardinal to breathing and to hypertension.

## 5. The psychoneuroimmunology of the ACS

### 5.1. PNI of plaque instability

Many of the immune/inflammatory factors playing a role in plaque instability have been correlated with psychological factors. Appels et al. [54] found that subjects high on vital exhaustion (VE) had significantly higher titers to CMV than those low on VE. In a meta-analysis of methodologically sound studies, depression was correlated with cellular immune suppression [63], which is critical to activation of agents including CMV and CP. Elevations of plasma pro-inflammatory cytokines (e.g. IL-1) and decreases in anti-inflammatory cytokines (e.g. IL-4) have been associated with acute stress [64–66], with VE among cardiac patients [17] and with depression [67,68]. Vital exhaustion has also been associated with reduced activity of plasminogen activator inhibitor I, which may lead to increased fibrinolysis [69]. The latter may then lead to further instability of the plaque by breaking extra-cellular plaque components and by enhancing additional immune activity. It has recently been found that hostility and life-events were positively correlated with percentage of monocytes, while perceived control and social support

were inversely correlated with percentage of monocytes in the blood of ACS patients [70]. Together, these relations suggest that psychological factors may affect synthesis of pro-inflammatory cytokines, recruitment of monocytes, activation of viral agents and oxidation of LDL. In the context of a moderate atherosclerotic plaque and a dysfunctional endothelium, such psychologically induced immune and inflammatory activation may contribute to plaque instability via one of the triggers described above (see Table 1).

### 5.2. PNI of plaque rupture

Degree of anger while recalling an annoying event was strongly correlated with vasoconstriction ( $r=0.82$ ) in narrowed CAD vessels [71]. Hostility is positively correlated with sympathetic arousal [72], and vasoconstriction is sympathetically mediated [73]. Narrowed arteries with dysfunctional endothelium appear to be sensitive to sympathetic arousal [74], making such arterial segments more prone towards anger-induced vasoconstriction. Psychological states have been associated with TNF- $\alpha$  and IFN- $\gamma$  as mentioned above [17], which may increase the vasoconstrictor endothelin-1 [75]. Finally, platelets, which are also correlated with anger/hostility (see below), release thromboxane A<sub>2</sub>, which causes vasoconstriction as well.

Hostility may be causally related to BP since reductions in hostility were significantly positively correlated with, and preceded in time, reductions in diastolic-BP in a randomized-controlled hostility-reduction trial [76]. An immunological pathway linking psychological stress to elevated BP was also identified since stress-induced elevations in BP were found to be strongly correlated (between  $r=0.63$  and  $0.70$ ) with stress-induced changes in IL-6 and IL-1 receptor antagonist [66].

Hostility-induced vasoconstriction and elevations in epinephrine and norepinephrine [72] may result in high cardiac-output, blood-flow and BP, which may increase

shear stress. High shear stress also increases the risk of rupturing a vulnerable plaque [2] (see Table 1).

### 5.3. PNI of thrombosis

Anger-expression and hostility have been found to be significantly and positively correlated with platelet aggregation [73], platelet activation as indexed by  $\beta$ -thromboglobulin (BTG) [74], and with activation of fibrinogen receptors and fibrinogen binding [80]. Epinephrine, associated with anger and hostility [72], was found to enhance thrombosis as well [76]. Depression is associated with enhanced activation of platelets and with enhanced release of BTG [77,78]. Depression is also associated with elevated IL-6, which as mentioned above, can activate platelets as well [41] (see Table 1).

In summary, all three basic stages of the ACS (plaque instability, plaque rupture, and thrombosis) can be partly explained by converging multidisciplinary evidence, modeled by a PNI framework (see Table 1). These processes can be explained by linking events taking place at the level of the central nervous system (e.g. brain secretion of norepinephrine), systemic immune and neuroendocrine level (e.g. recruitment of T-cells), and at the molecular and cellular level of the coronary plaque (e.g. macrophage release of MMP), all contributing to the probability of an ACS. Table 1 depicts the entire proposed PNI model integrated into the three phases of the ACS. We believe that this model not only partly explains previously demonstrated relations between psychological factors and the ACS [9–11,13–16], but may add to and broaden the biological model of the ACS.

## 6. Maintenance of a psychoneuroimmunologically induced ACS

Two processes may explain how PNI-induced effects may endure and lead to an ACS. The first concerns

Table 1  
Psychological, neuroendocrine, immunological and hemodynamic factors in the acute coronary syndrome

| Psychological factors                                    | Neuroendocrine factors              | Immune and cell factors                                              | Hemodynamic factors                                  | Acute coronary syndrome stage                    |
|----------------------------------------------------------|-------------------------------------|----------------------------------------------------------------------|------------------------------------------------------|--------------------------------------------------|
| Hostility, depression, acute stress and vital exhaustion | Norepinephrine, CRH, ACTH, Cortisol | IL-1 $\beta$ , IL-6, TNF- $\alpha$ , IFN- $\gamma$ , monocytes, MMPs |                                                      | Plaque instability                               |
| Hostility and acute stress                               | Norepinephrine<br>Epinephrine       | IL-1 $\beta$ , IL-6, TNF- $\alpha$                                   | Vasoconstriction, elevated BP, shear stress          | Plaque rupture                                   |
| Hostility, depression                                    | Epinephrine                         | IL-1 $\beta$ , IL-6, TNF- $\alpha$ ,                                 | Pro-coagulant and anti-coagulant factors (C-protein) | Thrombosis $\Rightarrow$ acute coronary syndrome |

CRH, corticotrophic releasing hormone; ACTH, adrenocorticotrophic hormone; IL, interleukin; TNF, tumor necrosis factor; IFN, interferon; BP, blood pressure; MMPs, metalloproteinases.

relations between the three proposed stages. It is possible that superimposed thrombosis may actually amplify plaque instability in the following manner. Activation of platelets may induce leukocyte-platelet adhesion units, which have been found to markedly increase levels of IL-1, IL-8 and MCP-1 [79]. These elevations may then restart a continuous cycle of monocyte recruitment and macrophage-induced plaque instability. Under conditions of vasoconstriction or elevated BP, plaque rupture may then occur, resulting again with thrombosis, and further increase the probability of an ACS.

Second, persistence of immune processes thought to be critical in the etiology of the ACS may result from an imbalance between neuroendocrine factors that enhance and factors that inhibit immune responses. Over-activity of the immune response requires lack of the usual negative feedback induced by cortisol on immune/inflammatory responses. This feedback is expected to occur due to the immune to brain communication described earlier, involving the vagal nerve. Chrousos [80] proposed that ‘cortisol-resistance’ can lead to lack of attenuation of the inflammatory response. Certain psychological factors linked to ACS such as depression (atypical depression) and certain physical illnesses linked to ACS such as rheumatoid arthritis [81] are indeed characterized by cortisol resistance [80]. Such cortisol resistance (insufficient cortisol-induced immune suppression) may account for the persistence of PNI processes and of the inflammatory response etiologically important in the ACS as described above.

## 7. Future directions and implications for treatment

Several issues need to be clarified in future research in relation to the proposed model. First, do different psychological states (hostility/anger, acute stress, vital exhaustion and depression) lead to ACSs of different severity mediated via different elements of the model, or is the combination of psychological traits/states necessary for an ACS? Given the multiple roles of OX-LDL and the CD40L–CD40 co-stimulatory system, future studies need to examine whether drug treatments targeting them may minimize a PNI-mediated ACS. Finally, more work needs to be done on the role of cortisol resistance in the maintenance of PNI processes potentially leading to an ACS.

The proposed model may explain the effects of psychological interventions on reducing mortality in ACS [82]. Certain behavioral techniques such as relaxation and guided imagery have been found to reduce inflammatory responses [83] and to positively affect post-MI patients [84]. The medulla and amygdala modulate the effects of peripheral IL-1 on the HPA axis [60]. Accordingly, one may speculate that relaxation techniques, which affect breathing and sympathetic arousal, may regulate a central-

ly orchestrated inflammatory response associated with the ACS. Should relaxation reduce inflammatory responses in ACS patients, this may reduce adverse outcomes following inflammatory responses in ACS [85,86]. These issues are currently under investigation by our research team and by others. Finally, beta-blockers, such as nadolol, which reduce aggression and suspiciousness [87], may also be tested for their effectiveness in reducing hostility.

## Acknowledgements

The authors wish to thank Professor Charles Dinarello and Dr Hava Golan for providing their comments on earlier versions of this manuscript.

## References

- [1] Hackett D, Davies G, Maseri A. Pre-existing coronary stenoses in patients with first myocardial infarction are not necessarily severe. *Eur Heart J* 1988;9:1317–1323.
- [2] Schroeder AP, Falk E. Pathophysiology and inflammatory aspects of plaque rupture. *Cardiol Clin* 1996;14:211–220.
- [3] Ross R. Atherosclerosis: an inflammatory disease. *New Engl J Med* 1999;340:115–126.
- [4] Fuchs LC, Landas SK, Johnson AK. Behavioral stress alters coronary vascular reactivity in borderline hypertensive rats. *J Hypertens* 1997;15:301–307.
- [5] Ghiadoni L, Donald AE, Cropley M et al. Mental stress induces transient endothelial dysfunction in humans. *Circulation* 2000;102:2473–2478.
- [6] Barefoot JC. Developments in the measurements of hostility. In: Friedman HS, editor. *Hostility, coping and health*, Washington, DC: American Psychological Association, 1992, pp. 13–31.
- [7] Dembroski TM, MacDougall JM, Costa PT, Grandits GA. Components of hostility as predictors of sudden death and myocardial infarction in the multiple risk-factor intervention trial. *Psychosom Med* 1989;51:514–522.
- [8] Mendes De Leon CF. Anger and impatience/irritability in patients of low socioeconomic status with acute coronary heart disease. *J Behav Med* 1992;15:273–284.
- [9] Mittleman MA, Maclure M, Sherwood JB et al. Triggering of acute myocardial infarction onset by episodes of anger. Determinants of myocardial infarction onset study investigators. *Circulation* 1995;92:1720–1725.
- [10] Moller J, Hallqvist J, Diderichsen F et al. Do episodes of anger trigger myocardial infarction? A case-crossover analysis in the Stockholm Heart Epidemiology Program (SHEEP). *Psychosom Med* 1999;61:842–849.
- [11] Barefoot JC, Larsen S, von der Leith L, Schroll M. Hostility, acute myocardial infarction and mortality in a sample of older Danish men and women. *Am J Epidemiol* 1995;142:477–484.
- [12] Hecker MHL, Chensy MA, Black GW, Frautschi N. Coronary-prone behaviors in the western collaborative group study. *Psychosom Med* 1988;50:153–164.
- [13] Appels A, Mulder P. Excess fatigue as a precursor of myocardial infarction. *Eur Heart J* 1988;9:758–764.
- [14] Everson SA, Goldberg DE, Kaplan GA et al. Hopelessness and risk of mortality and incidence of myocardial infarction and cancer. *Psychosom Med* 1996;58:113–121.
- [15] Frasure-Smith N, Lesperance F, Juneau M, Talajic M, Bourassa

- MG. Gender, depression, and one-year prognosis after myocardial infarction. *Psychosom Med* 1999;61:26–37.
- [16] Frasure-Smith N, Lesperance F, Talajic M. Depression following myocardial infarction. Impact on 6-month survival. *J Am Med Assoc* 1993;270:1819–1825.
  - [17] Appels A. Inflammation and the mental state before an acute coronary event. *Ann Med* 1999;1:41–44.
  - [18] Adams DO. Molecular biology of macrophage activation: a pathway whereby psychosocial factors can potentially affect health. *Psychosom Med* 1994;56:316–327.
  - [19] Goodkin K, Appels A. Behavioral–neuroendocrine–immunologic interactions in myocardial infarction. *Med Hypotheses* 1997;48:209–214.
  - [20] Mann DL. The effect of tumor necrosis factor-alpha on cardiac structure and function: a tale of two cytokines. *J Card Fail* 1996;2:S165–172.
  - [21] Yudkin JS, Kumari M, Humphries SE, Mohamed-Ali V. Does inflammation contribute to thrombotic events? *Haemostasis* 2000;30(Suppl 2):34–40.
  - [22] Arbustini E, Dal Bello B, Morbini P et al. Plaque erosion is a major substrate for coronary thrombosis in acute myocardial infarction. *Heart* 1999;82:269–272.
  - [23] Frostegard J, Nilsson J, Haegerstrand A et al. Oxidized low density lipoprotein induces differentiation and adhesion of human monocytes and the monocytic cell line U937. *Proc Natl Acad Sci USA* 1990;87:904–908.
  - [24] Huang Y, Jaffa A, Koskinen S, Takei A, Lopes-Virella MF. Oxidized LDL-containing immune complexes induce Fc gamma receptor I-mediated mitogen-activated protein kinase activation in THP-1 macrophages. *Arterioscler Thromb Vasc Biol* 1999;19:1600–1607.
  - [25] Higuchi ML, Sambiasi N, Palomino S et al. Detection of *Mycoplasma pneumoniae* and *Chlamydia pneumoniae* in ruptured atherosclerotic plaques. *Braz J Med Biol Res* 2000;33:1023–1026.
  - [26] Span AHM, van Boven CPA, Bruggeman CPA. The effect of cytomegalovirus infection on the adherence of polymorphonuclear leucocytes to endothelial cells. *Eur J Clin Invest* 1989;19:542–548.
  - [27] Dinarello CA. Biologic basis for interleukin-1 in disease. *Blood* 1996;87:2095–2147.
  - [28] Wang N, Tabas I, Winchester R et al. Interleukin 8 is induced by cholesterol loading of macrophages and expressed by macrophage foam cells in human atheroma. *J Biol Chem* 1996;271:8837–8842.
  - [29] Yazdani S, Simon AD, Vidhun R et al. Inflammatory profile in unstable angina versus stable angina in patients undergoing percutaneous interventions. *Am Heart J* 1998;136:357–361.
  - [30] Ritchie ME. Nuclear factor-kappaB is selectively and markedly activated in humans with unstable angina pectoris. *Circulation* 1998;98:1707–1713.
  - [31] Mach F, Schonbeck U, Bonnefoy JY, Pober JS, Libby P. Activation of monocyte/macrophage functions related to acute atheroma complication by ligation of CD40: induction of collagenase, stromelysin, and tissue factor. *Circulation* 1997;96:396–399.
  - [32] Shah PK, Falk E, Badimon JJ et al. Human monocyte-derived macrophages induce collagen breakdown in fibrous caps of atherosclerotic plaques. Potential role of matrix-degrading metalloproteinases and implications for plaque rupture. *Circulation* 1995;92:1565–1569.
  - [33] Brown DL, Hibbs MS, Kearney M, Loushin C, Isner JM. Identification of 92-kDa gelatinase in human coronary atherosclerotic lesions. Association of active enzyme synthesis with unstable angina. *Circulation* 1995;91:2125–2131.
  - [34] Libby P, Sukhova G, Lee RT, Galis ZS. Cytokines regulate vascular functions related to stability of the atherosclerotic plaque [review]. *J Cardiovasc Pharmacol* 1995;25:S9–12.
  - [35] Iversen PO, Nicolaysen A, Kvernebo K, Benestad HB, Nicolaysen G. Human cytokines modulate arterial vascular tone via endothelial receptors. *Pflüger's Arch* 1999;439:93–100.
  - [36] Eisenber S, Berk BC. The endothelial cell: Physiologic dysfunction and pathologic consequences. *Res Staff Physician* 1995;41:13–23.
  - [37] Dalekos GN, Elisaf M, Bairaktari E, Tsolas O, Siamopoulos KC. Increased serum levels of interleukin-1beta in the systemic circulation of patients with essential hypertension: additional risk factor for atherogenesis in hypertensive patients? *J Lab Clin Med* 1997;129:300–308.
  - [38] Takahashi H, Nishimura M, Sakamoto M et al. Effects of interleukin-1 beta on blood pressure, sympathetic nerve activity, and pituitary endocrine functions in anesthetized rats. *Am J Hypertens* 1992;5:224–229.
  - [39] Esmon CT, Johnson AE, Esmon NL. Initiation of the protein C pathway. *Ann NY Acad Sci* 1991;614:30–43.
  - [40] Johnson K, Aarden L, Choi Y, De Groot E, Creasey A. The proinflammatory cytokine response to coagulation and endotoxin in whole blood. *Blood* 1996;87:5051–5060.
  - [41] Oleksowicz L, Mrowiec Z, Issacs R, Dutcher JP, Puszkun E. Morphologic and ultrastructural evidence for interleukin-6 induced platelet activation. *Am J Hematol* 1995;48:92–99.
  - [42] Nawroth PP, Stern DM. Modulation of endothelial cell hemostatic properties by tumor necrosis factor. *J Exp Med* 1986;163:740–745.
  - [43] Esmon CT. Does inflammation contribute to thrombotic events? *Haemostasis* 2000;30(suppl 2):34–40.
  - [44] Beretz A, Klein-Soyer C, Archipoff G et al. Modulation by cytokines of leukocyte–endothelial cell interactions. Implications for thrombosis [review]. *Biorheology* 1990;27:455–460.
  - [45] Herbert TB, Cohen S. Stress and immunity in humans: a meta-analytic review. *Psychosom Med* 1993;55:364–379.
  - [46] Zorrilla EP, Luborsky L, McKay JR et al. The relationship of depression and stressors to immunological assays: a meta-analytic review. *Brain Behav Immun* 2001;15:199–226.
  - [47] Cohen S, Tyrrell DA, Smith AP. Psychological stress and susceptibility to the common cold. *New Engl J Med* 1991;325:606–612.
  - [48] Cohen S, Doyle W, Skoner D. Psychological stress, cytokine production, and severity of upper respiratory illness. *Psychosom Med* 1999;61:175–180.
  - [49] Glaser R, Kiecolt-Glaser JK, Marucha PT et al. Stress-related changes in proinflammatory cytokine production in wounds. *Arch Gen Psychiatry* 1999;56:450–456.
  - [50] Marsland AL, Cohen S, Rabin BS, Manuck SB. Associations between stress, trait negative affect, acute immune reactivity, and antibody response to hepatitis B injection in healthy young adults. *Health Psychol* 2001;20:4–11.
  - [51] Pennebaker JW, Kiecolt-Glaser JK, Glaser R. Disclosure of traumas and immune function: health implications for psychotherapy. *J Consult Clin Psychol* 1988;56:239–245.
  - [52] Castes M, Hagel I, Palnque M et al. Immunological changes associated with clinical improvement of asthmatic children subjected to psychosocial intervention. *Brain Behav Immun* 1999;13:1–13.
  - [53] Murashko VV, Alekseeva NV, Strutsynskii AV, Torkhovskaia TI, Fortinskaia ES. Relation between features of the psychoemotional status and lipid metabolism of patients with ischemic heart disease and arrhythmias [in Russian]. *Ter Arkh* 1986;58:94–97.
  - [54] Appels A, Bar FW, Bar J, Bruggeman C, de Baets M. Inflammation, depressive symptomatology, and coronary artery disease. *Psychosom Med* 2000;62:601–605.
  - [55] Ek M, Kurosawa M, Lundeberg T, Ericsson A. Activation of vagal afferents after intravenous injection of interleukin-1beta: role of endogenous prostaglandins. *J Neurosci* 1998;18:9471–9479.
  - [56] Laye S, Bluthé RM, Kent S et al. Subdiaphragmatic vagotomy blocks induction of IL-1 beta mRNA in mice brain in response to peripheral LPS. *Am J Physiol* 1995;268:R1327–1331.
  - [57] Maier SF, Watkins LR. Cytokines for psychologists: implications of bidirectional immune-to-brain communication for understanding behavior, mood, and cognition. *Psychol Rev* 1998;105:83–107.
  - [58] Sapolsky R, Rivier C, Yamamoto G, Plotsky P, Vale W. Interleukin-1 stimulates the secretion of hypothalamic corticotropin-releasing factor. *Science* 1987;238:522–524.
  - [59] Ericsson A, Kovacs KJ, Sawchenko PE. A functional anatomical

- analysis of central pathways subserving the effects of interleukin-1 on stress-related neuroendocrine neurons. *J Neurosci* 1994;14:897–913.
- [60] Xu Y, Day TA, Buller KM. The central amygdala modulates hypothalamic–pituitary–adrenal axis responses to systemic interleukin-1 $\beta$  administration. *Neuroscience* 1999;94:175–183.
- [61] Schneider F, Gur RE, Alavi A et al. Cerebral blood-flow changes in limbic regions induced by unsolvable anagram tasks. *Am J Psychiatry* 1996;153:206–212.
- [62] Tebartz van Elst L, Woermann FG, Lemieux L, Trimble MR. Amygdala enlargement in dysthymia—a volumetric study of patients with temporal lobe epilepsy. *Biol Psychiatry* 1999;46:1614–1623.
- [63] Herbert TB, Cohen S. Depression and immunity: a meta-analytic review. *Psychol Bull* 1993;113:472–486.
- [64] Ackerman KD, Martino M, Heyman R, Moyna NM, Rabin BS. Stressor-induced alteration of cytokine production in multiple sclerosis patients and controls. *Psychosom Med* 1998;60:484–491.
- [65] Maes M, Song C, Lin A et al. The effects of psychological stress on humans: increased production of pro-inflammatory cytokines and a Th1-like response in stress-induced anxiety. *Cytokine* 1998;10:313–318.
- [66] Steptoe A, Willemsen G, Owen N, Flower L, Mohamed-Ali V. Acute mental stress elicits delayed increases in circulating inflammatory cytokine levels. *Clin Sci (Lond)* 2001;101:185–192.
- [67] Maes M, Bosmans E, Meltzer HY, Scharpe S, Suy E. Interleukin-1 $\beta$ : A putative mediator of HPA axis hyperactivity in major depression. *Am J Psychiatry* 1993;150:1189–1193.
- [68] Kronfol Z, Remick DG. Cytokines and the brain: implications for clinical psychiatry. *Am J Psychiatry* 2000;157:683–694.
- [69] Kop WJ, Hamulyak K, Pernot C, Appels A. Relationship of blood coagulation and fibrinolysis to vital exhaustion. *Psychosom Med* 1998;60:352–358.
- [70] Gidron Y, Armon T, Gilutz H, Huleihel M. Psychological correlates of white blood cell subsets in acute coronary syndrome patients. In: International conference of the Psychoneuroimmunology Research Society (May), Leiden, The Netherlands, 1998, Presented poster.
- [71] Boltwood MD, Taylor CB, Burke MB, Grogan H, Giacomini J. Anger report predicts coronary artery vasomotor response to mental stress in atherosclerotic segments. *Am J Cardiol* 1993;72:1361–1365.
- [72] Malarkey WB, Kiecolt-Glaser JK, Pearl D, Glaser R. Hostile behavior during marital conflict alters pituitary and adrenal hormones. *Psychosom Med* 1994;56:41–51.
- [73] Wenneberg SR, Schneider RH, Walton KG et al. Anger expression correlates with platelet aggregation. *Behav Med* 1997;22:174–177.
- [74] Markovitz JH, Matthews KA, Smitherman T et al. Effects of hostility on platelet reactivity to psychological stress in coronary heart disease patients and healthy controls. *Psychosom Med* 1996;58:143–149.
- [75] Markovitz JH. Hostility is associated with increased platelet activation in coronary heart disease. *Psychosom Med* 1998;60:586–591.
- [76] Lin H, Young DB. Opposing effects of plasma epinephrine and norepinephrine on coronary thrombosis in vivo. *Circulation* 1995;91:1135–1142.
- [77] Laghrissi-Thode F, Wagner WR, Pollock BG, Johnson PC, Finkel MS. Elevated platelet factor 4 and beta-thromboglobulin plasma levels in depressed patients with ischemic heart disease. *Biol Psychiatry* 1997;15:290–295.
- [78] Musselman DL, Tomer A, Manatunga AK et al. Exaggerated platelet reactivity in major depression. *Am J Psychiatry* 1996;153:1313–1317.
- [79] Neumann FJ, Marx N, Gawaz M et al. Induction of cytokine expression in leukocytes by binding of thrombin-stimulated platelets. *Circulation* 1997;95:2387–2394.
- [80] Chrousos GP. The hypothalamic–pituitary–adrenal axis and immune-mediated inflammation. *New Engl J Med* 1995;332:1351–1362.
- [81] Wislowska M, Sypula S, Kowalik I. Echocardiographic findings, 24-h electrocardiographic Holter monitoring in patients with rheumatoid arthritis according to Steinbrocker's criteria, functional index, value of Waaler–Rose titre and duration of disease. *Clin Rheumatol* 1998;17:369–377.
- [82] Dusseldorp E, van Elderen T, Maes S, Meulman J, Kraaij V. A meta-analysis of psychoeducational programs for coronary heart disease patients. *Health Psychol* 1999;18:506–519.
- [83] Holden-Lund C. Effects of relaxation with guided-imagery on surgical stress and wound healing. *Res Nurs Health* 1988;11:235–244.
- [84] van Dixhoorn JJ, Duivenvoorden HJ. Effect of relaxation therapy on cardiac events after myocardial infarction: a 5-year follow-up study. *J Cardiopulm Rehabil* 1999;19:178–185.
- [85] Biasucci LM, Liuzzo G, Fantuzzi AG et al. Increasing levels of interleukin (IL)-1 $\alpha$  and IL-6 during the first two days of hospitalization in Unstable Angina are associated with increased risk of in-hospital coronary events. *Circulation* 1999;99:2079–2084.
- [86] Shibata M, Endo S, Inada K et al. Elevated plasma levels of interleukin-1 receptor antagonist and interleukin-10 in patients with acute myocardial infarction. *J Interferon Cytokine Res* 1997;17:145–150.
- [87] Ratey JJ, Sorgi P, O'Driscoll GA et al. Nadolol to treat aggression and psychiatric symptomatology in chronic psychiatric inpatients: a double-blind, placebo-controlled study. *J Clin Psychiatry* 1992;53:41–46.
